# Supplementary material for: Derivation and validation of four patient clusters in Still’s disease, results from GIRRCS AOSD-study group and AIDA Network Still Disease Registry
Source: PubMed Central journal article supplement (PMC10660445; doi:10.1136/rmdopen-2023-003419), 2023-11-20

**Supplementary Table 1. Cluster means standardized according to z-scores.**

| Clusters | Age         | Systemic score | ESR        | CRP        | Ferritin    |
|----------|-------------|----------------|------------|------------|-------------|
| 1        | -0.67898749 | 0.20836320     | 0.6611048  | -0.4520566 | -0.25034722 |
| 2        | 0.13809507  | -0.54304646    | -0.8867966 | -0.3264653 | -0.36492329 |
| 3        | -0.02664983 | -0.07922267    | -0.1437485 | 0.9086280  | 2.67651075  |
| 4        | 0.81644717  | 0.64005443     | 0.5591883  | 0.8747547  | -0.09962296 |

**Abbreviations.** ESR: erythrocyte sedimentation rate, CRP: C reactive protein

**Supplementary Figure 1. Elbow plot and visualization of Clusters**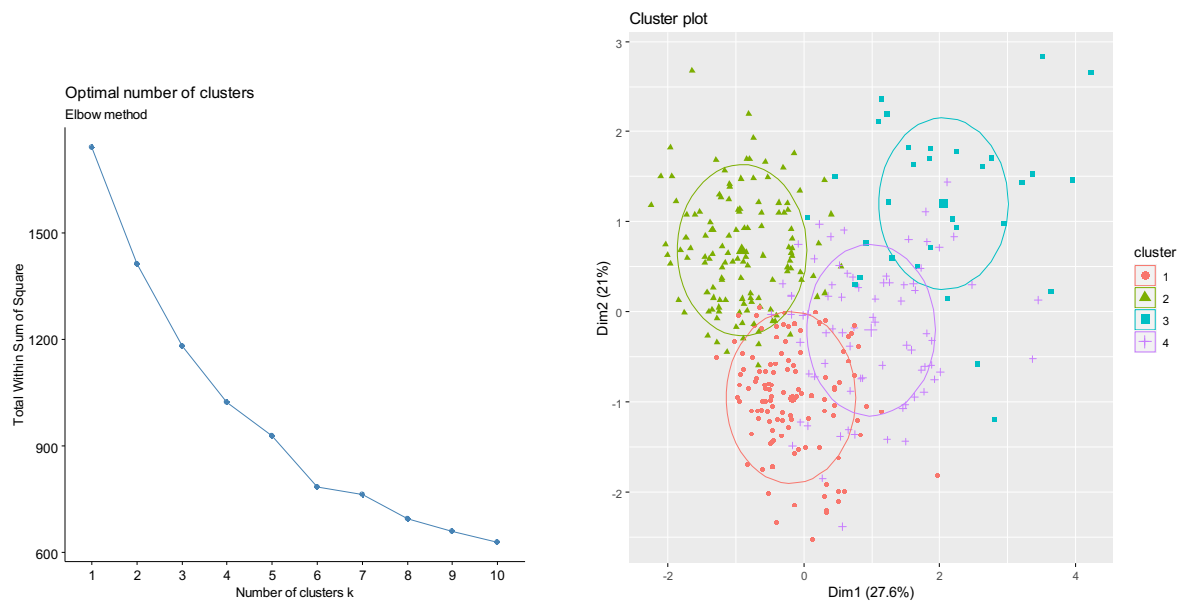

Supplement: rmdopen-2023-003419supp001.pdf [file rmdopen-2023-003419supp001.pdf]
